# Supplementary material for: Flexible self-supported metal–organic framework mats with exceptionally high porosity for enhanced separation and catalysis
Source: Royal Society of Chemistry journal article supplement (doi:10.1039/c7ta08210j), 2017-10-12
Supplement: c7ta08210j1.pdf [file c7ta08210j1.pdf]

Electronic Supplementary Material (ESI) for J. Mater. Chem. A

## **Flexible Self-Supported Metal-Organic Frameworks Mats with Exception High Porosity for Enhanced Separation and Catalysis**

*Huixin Liang, Xiuling Jiao, Cheng Li\*, and Dairong Chen*

### **Preparation of fibrous metal oxide mats**

#### **Al<sub>2</sub>O<sub>3</sub>**

According to our previously reported method,<sup>[1]</sup> 6.03 mL of HCOOH (Sinopharm Chemical Reagent Company, 88%), 6.86 mL of CH<sub>3</sub>COOH (Sinopharm Chemical Reagent Company, 99.7%), and 1.08 g of aluminum powder (Sinopharm Chemical Reagent Company, 98%) were added in 17.28 mL of DI water and the mixture was magnetically stirred at 60~80 °C and further refluxed for 12 h until the aluminum powder completely dissolved. A colorless transparent sol was obtained after filtration. Then 0.1 g of PEO (Sinopharm Chemical Reagent Company, 98%) was added to improve the spinnability. For electrospinning, the as-prepared sol was added to a 20.0 mL plastic syringe with a metallic needle (inner diameter ~0.8 mm) at a speed of 2.0 mL h<sup>-1</sup>. The distance between the collector and the needle was adjusted at 18.0 cm, and the applied voltage was fixed at 18 kV. The humidity was controlled below 10% during the electrospinning process. The electrospun gel fibers were dried at 80 °C and

then calcined in the air firstly at 600 °C for 2 h with a ramping rate of 1 °C min<sup>-1</sup>, and then at 700, 800, or 900 °C for 2 h with a ramping rate of 5 °C min<sup>-1</sup>.

## **CuO**

1.9052 g of Cu(CH<sub>3</sub>COO)<sub>2</sub> (Shanghai Macklin Biochemical Co., Ltd., 99.5%) was dissolved in 10 mL deionized water. Then, 5 mL 10 wt% of PVA (Aladdin Reagent Company, alcoholysis: 87.0~89.0%) was added and the mixture was continuously stirred at room temperature for 3 h. For electrospinning, the as-prepared solution was added to a 10.0 mL plastic syringe with a metallic needle (inner diameter ~0.8 mm) at a speed of 1.0 mL h<sup>-1</sup>. The distance between the needle and the collector was set to be 15.0 cm, and the applied voltage was fixed at 16 kV. The humidity was controlled below 10% during the electrospinning process. The electrospun gel fibers were dried at 80 °C and then calcined in the air at 400 °C for 2 h with a ramping rate of 1 °C min<sup>-1</sup>.

## **Co<sub>3</sub>O<sub>4</sub>**

Following a literature method,<sup>[2]</sup> 3 g of Co(CH<sub>3</sub>COO)<sub>2</sub>·4H<sub>2</sub>O (Sinopharm Chemical Reagent Company, 99%) was dissolved in 7.5 mL DMF. Then 1 g of PVP was added and the mixture was continuously stirred at room temperature for 6 h. For electrospinning, the as-prepared solution was added to a 20.0 mL plastic syringe with a metallic needle (inner diameter ~0.8 mm) at a speed of 1.0 mL h<sup>-1</sup>. The distance between the needle and the collector was set to be 15.0 cm, and the applied voltage was fixed at 20 kV. The humidity was controlled below 10% during the

electrospinning process. The electrospun gel fibers were dried at 80 °C and then calcined in the air at 400 °C for 2 h with a ramping rate of 1 °C min<sup>-1</sup>.

## **ZnO**

Following a literature method,<sup>[3]</sup> 2 g of PVP was dissolved in 5 mL DMF (Sinopharm Chemical Reagent Company, 99.5%). To this solution, 5 g of Zn(CH<sub>3</sub>COO)<sub>2</sub>·2H<sub>2</sub>O (Sinopharm Chemical Reagent Company, 99.5%) was added under vigorous magnetic stirring at room temperature. For electrospinning, the as-prepared solution was added to a 20.0 mL plastic syringe with a metallic needle (inner diameter ~0.8 mm) at a speed of 1.5 mL h<sup>-1</sup>. The distance between the needle and the collector was set to be 10.0 cm, and the applied voltage was fixed at 15 kV. The humidity was controlled below 10% during the electrospinning process. The electrospun gel fibers were dried at 80 °C and then calcined in the air at 500 °C for 5 h with a ramping rate of 1 °C min<sup>-1</sup>.

## **ZrO<sub>2</sub>**

0.3g of PVP was dissolved in 5 mL of ethanol (Sinopharm Chemical Reagent Company, 98%). To this solution, 10 g of Zr(CH<sub>3</sub>COO)<sub>4</sub> (Sinopharm Chemical Reagent Company, Zr~15.0-16.0% in ethanol) was added under vigorous magnetic stirring at room temperature. For electrospinning, the as-prepared sol was added to a 20.0 mL plastic syringe with a metallic needle (inner diameter ~0.8 mm ) at a speed of 2.0 mL h<sup>-1</sup>. The distance between the needle and the collector was 25.0 cm and the applied voltage was 20 kV. The humidity was controlled below 10% during the

electrospinning process. The electrospun gel fibers were dried at 50 °C for 12 h and then calcined in the air at 600 °C for 2 h with a ramping rate of 1 °C min<sup>-1</sup>.

### **Fe<sub>2</sub>O<sub>3</sub>**

5 g of Fe(NO<sub>3</sub>)<sub>3</sub>·9H<sub>2</sub>O (Sinopharm Chemical Reagent Company, 99%) was added slowly into a ethanol (5.0 mL) and deionized water (5.0 mL) solution containing 4.5 g of PVP under vigorous magnetic stirring at room temperature. For electrospinning, the as-prepared solution was added to a 20.0 mL plastic syringe with a metallic needle (inner diameter ~0.8 mm) at a speed of 1.8 mL h<sup>-1</sup>. The distance between the needle and the collector was set to be 10.0 cm, and the applied voltage was fixed at 16 kV. The humidity was controlled below 10% during the electrospinning process. The electrospun gel fibers were dried at 80 °C and then calcined in the air at 500 °C for 4 h with a ramping rate of 3 °C min<sup>-1</sup>.

### **Preparation of MOF powders**

#### **MIL-53(Al)**

1.3 g of Al(NO<sub>3</sub>)<sub>3</sub>·9H<sub>2</sub>O (Sinopharm Chemical Reagent Company, 99.5%) and 0.288 g of H<sub>2</sub>BDC were dissolved in 4.9 mL of deionized water. Then this solution was transferred to a 10 mL Teflon-lined steel autoclave and heated at 110 °C for 72 h. After the reaction, the powder was collected by centrifugation and washed with copious water for three times before dried overnight at 80 °C under vacuum.

#### **MIL-53(Al)-NH<sub>2</sub>**

3.1 g of  $\text{Al}(\text{NO}_3)_3 \cdot 9\text{H}_2\text{O}$  and 5 g of  $\text{NH}_2\text{-H}_2\text{BDC}$  were dissolved in 22.8 mL of deionized water. Then this solution was transferred to a 50 mL Teflon-lined autoclave and heated at 110 °C for 72 h. After the reaction, the powder was collected by centrifugation and washed with acetone for three times before dried overnight at 80 °C under vacuum.

### **HKUST-1**

0.3 g of  $\text{Cu}(\text{NO}_3)_2 \cdot 3\text{H}_2\text{O}$  (Sigma-Aldrich, 99%) and 0.5367 g of  $\text{H}_3\text{BTC}$  were dissolved in 15 mL ethanol and water (V/V=1:1) and stirred continuously for 15 min. Then the mixture were transferred to a 50 mL Teflon-lined autoclave and heated at 110 °C for 8 h. The precipitate was collected by centrifugation and washed with hot ethanol and water before dried under vacuum at 80 °C overnight.

### **ZIF-8**

0.136 g of  $\text{Zn}(\text{OAc})_2 \cdot 2\text{H}_2\text{O}$  (Sinopharm Chemical Reagent Company, 99.5%) and 0.1 g of 2-MeIM were dissolved in 10 mL DMF under magnetic stirring for 10 min. Then the mixture was transferred to a 20 mL Teflon-lined autoclave and heated at 100 °C for 5 h. The precipitate was collected by centrifugation and washed with ethanol before dried under vacuum at 80 °C overnight.

### **ZIF-67**

0.459 g of  $\text{Co}(\text{OAc})_2 \cdot 4\text{H}_2\text{O}$  (Sinopharm Chemical Reagent Company, 99.5%) and 1.187 g of 2-MeIM were dissolved in 15 ml methanol under magnetic stirring. Then

the mixture was transferred to a 20 mL Teflon-lined autoclave and heated at 110 °C for 24 h. The precipitate was collected by centrifugation and washed with ethanol before dried under vacuum at 80 °C overnight.

### **UiO-66**

0.177 g of  $\text{ZrCl}_4$  (Sigma-Aldrich, 99%) and 0.474 g of  $\text{H}_2\text{BDC}$  were added to a 50 mL Teflon-lined stainless-steel autoclave that contains 10 mL deionized water and 1 mL acetic acid. Then the autoclave was sealed and heated in the oven at 140 °C for 24 h. After the reaction the product was collected and washed thoroughly with DMF for three times and dried under vacuum at 150 °C.

### **MIL-88B(Fe)**

1.0 g of  $\text{Fe}(\text{NO}_3)_2 \cdot 3\text{H}_2\text{O}$  (Sinopharm Chemical Reagent Company, 99%) and 0.948 g of  $\text{H}_2\text{BDC}$  were dissolved in 10 mL DMF and water (V/V = 100:1) together with 0.3 mL acetic acid under magnetic stirring. Then the mixture was transferred to a 20 mL Teflon-lined autoclave and heated at 100 °C for 48 h. The precipitate was collected by centrifugation and washed with DMF and ethanol for five times before dried under vacuum at 80 °C overnight.

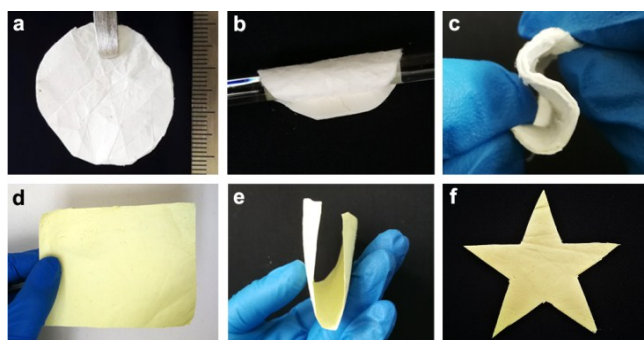

**Fig. S1** Photographs of the FS-MIL-53(Al) (a-c) and MIL-53(Al)-NH<sub>2</sub> FMs (d-e).

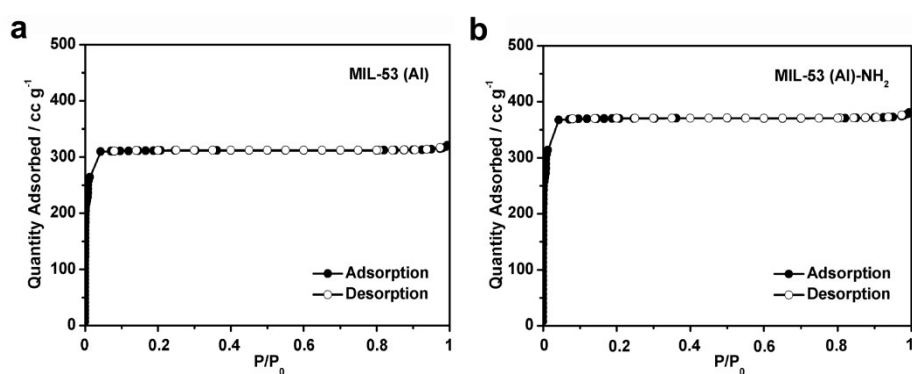

**Fig. S2** N<sub>2</sub> adsorption-desorption isotherms of the MIL-53(Al) (a) and MIL-53(Al)-NH<sub>2</sub> powders (b).

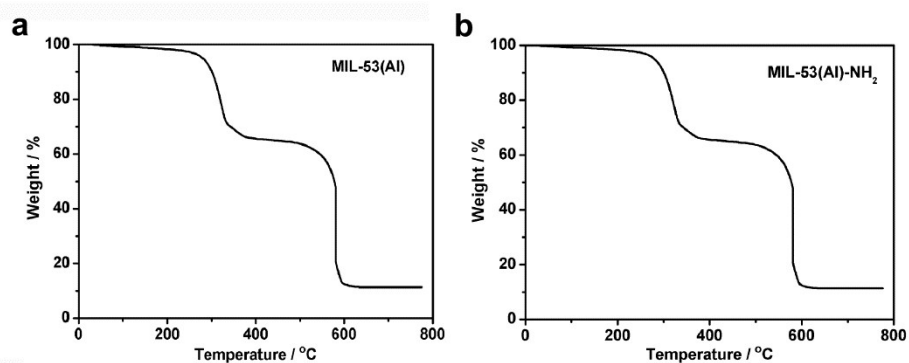

**Fig. S3** TGA curves of MIL-53(Al) (a) and MIL-53(Al)-NH<sub>2</sub> powders (b).

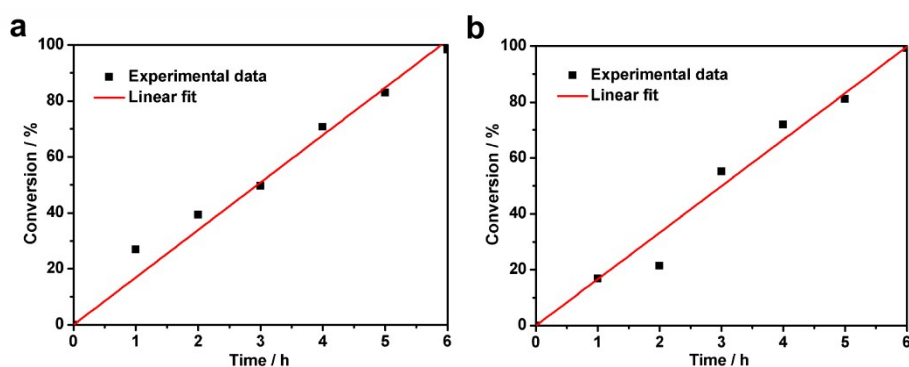

**Fig. S4** Plots of the conversion yield versus reaction time for FS-MIL-53(Al) (a) and MIL-53(Al)-NH<sub>2</sub> FM (b).



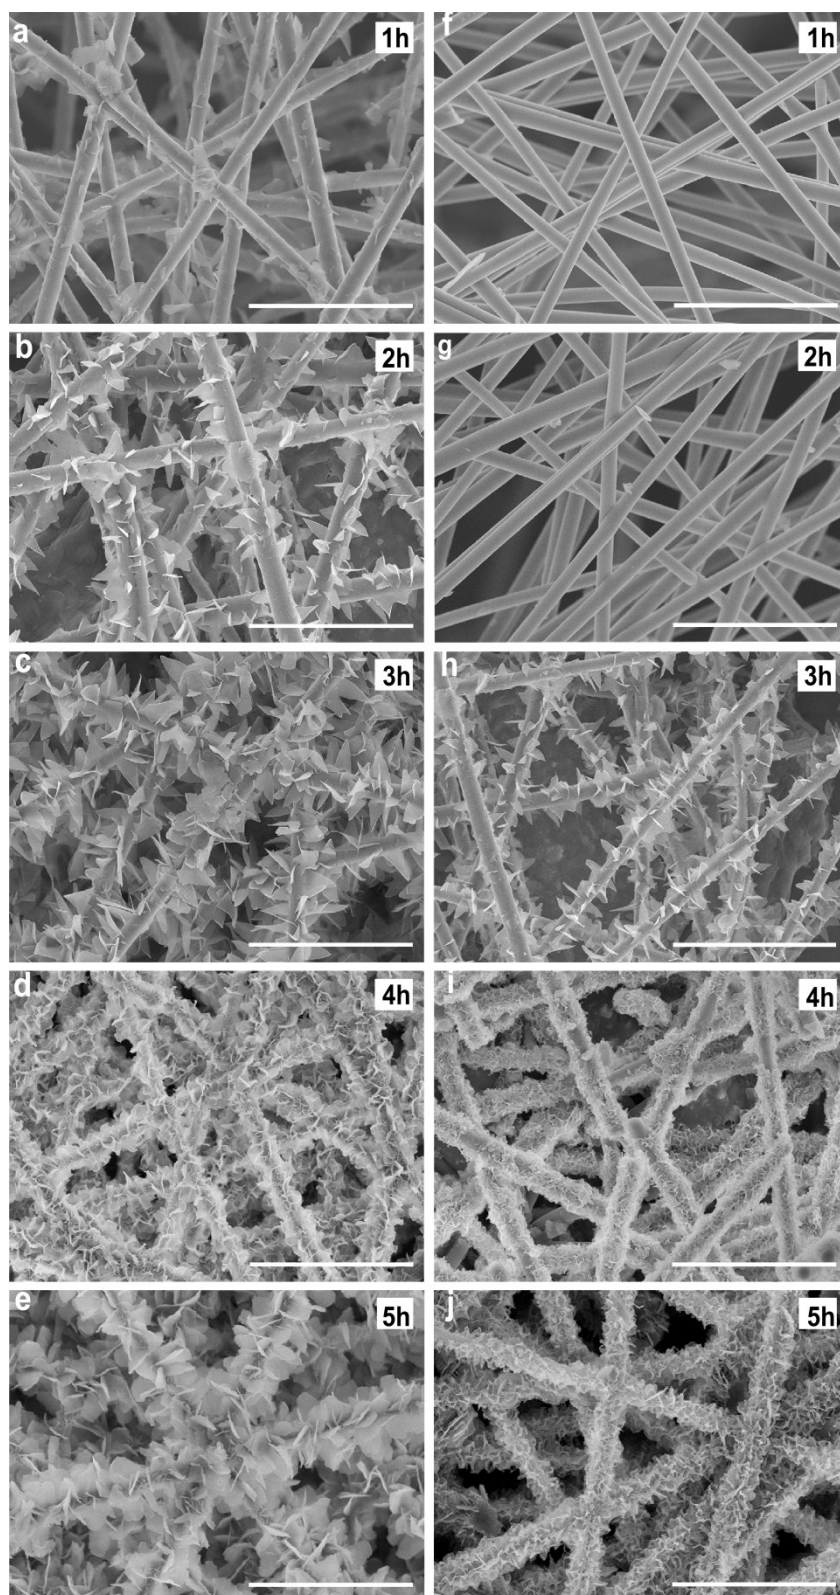

**Fig. S5** SEM images of mid-term products of the conversion reactions of  $\text{Al}_2\text{O}_3$  FMs with  $\text{H}_2\text{BDC}$  (a-e) and  $\text{H}_2\text{BDC-NH}_2$  (f-j). Scale bars represent 5  $\mu\text{m}$ .

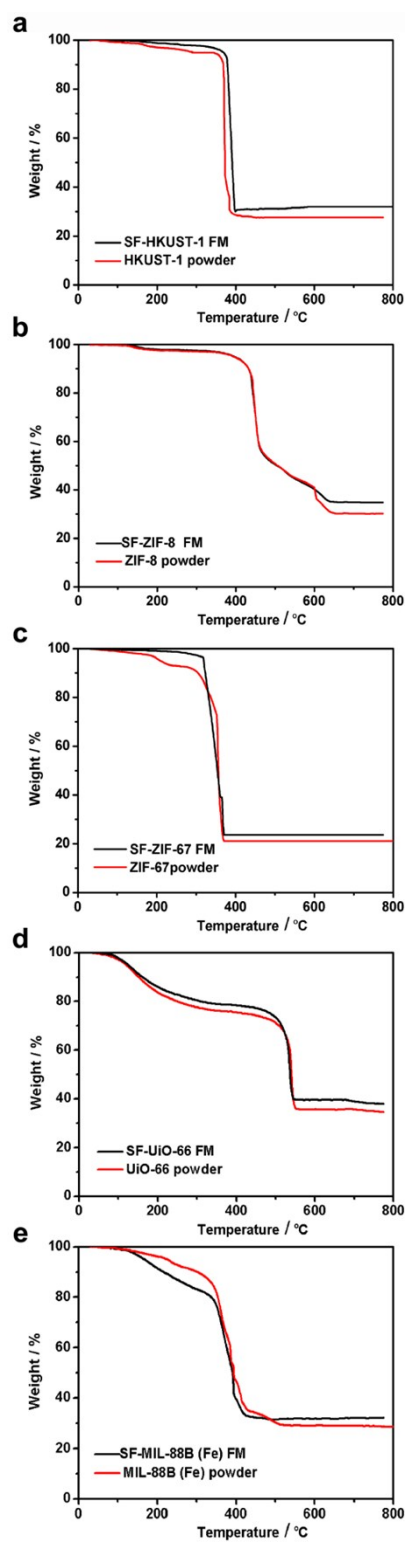

**Fig. S6** TGA curves of the FS-MOFs FMs and MOF powders: (a) HKUST-1, (b) ZIF-8, (c) ZIF-67, (d) UiO-66, and (e) MIL-88B (Fe).

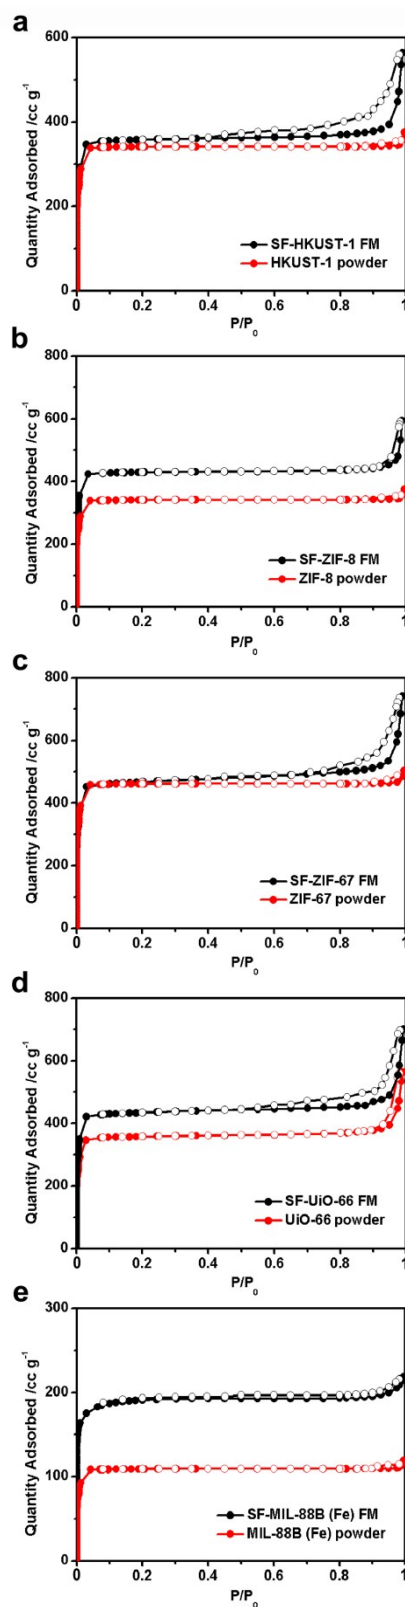

**Fig. S7** N<sub>2</sub> sorption-desorption isotherms of the FS-MOFs FMs and MOF powders: (a) HKUST-1, (b) ZIF-8, (c) ZIF-67, (d) UiO-66, and (e) MIL-88B(Fe).

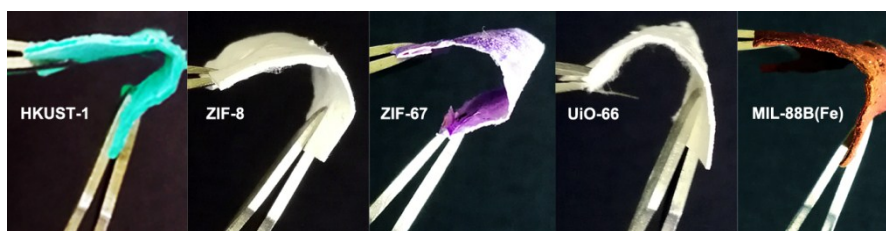

**Fig. S8** Photographs of various FS-MOF FMs showing they can be readily manipulated.

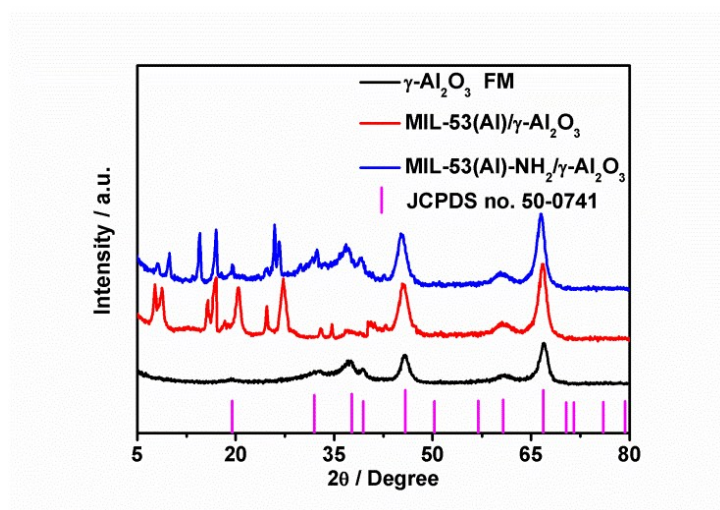

**Fig. S9** XRD patterns of  $\gamma$ - $\text{Al}_2\text{O}_3$  FMs before and after the conversion reactions with  $\text{H}_2\text{BDC}$  and  $\text{H}_2\text{BDC-NH}_2$ .

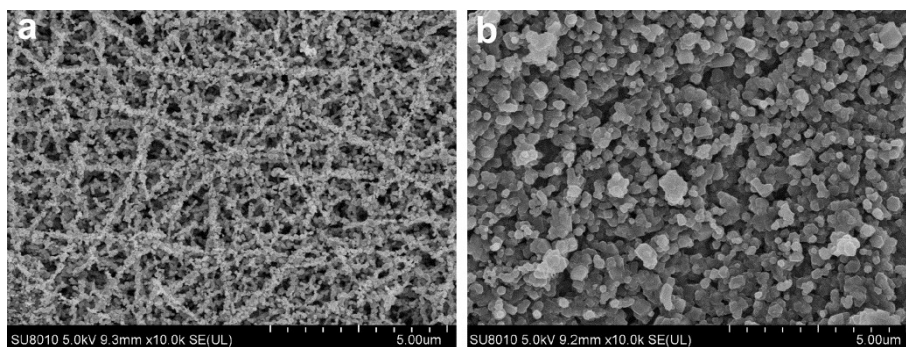

**Fig. S10** SEM images of the products of the reaction between ZnO FMs and 2-MeIM in water (a) and methanol (b).

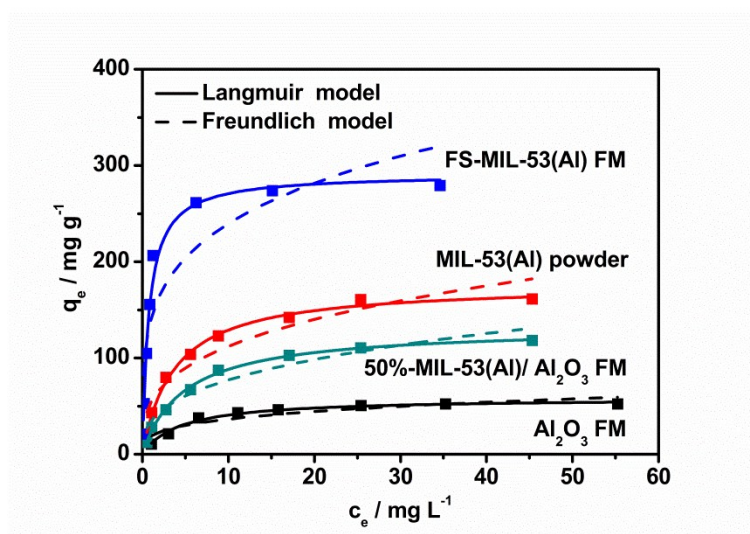

**Fig. S11** Adsorption isotherms of DMP on the FS-MIL-53(Al) FM, MIL-53(Al) powder, 50% MIL-53(Al)/Al<sub>2</sub>O<sub>3</sub> FM and Al<sub>2</sub>O<sub>3</sub> FM.

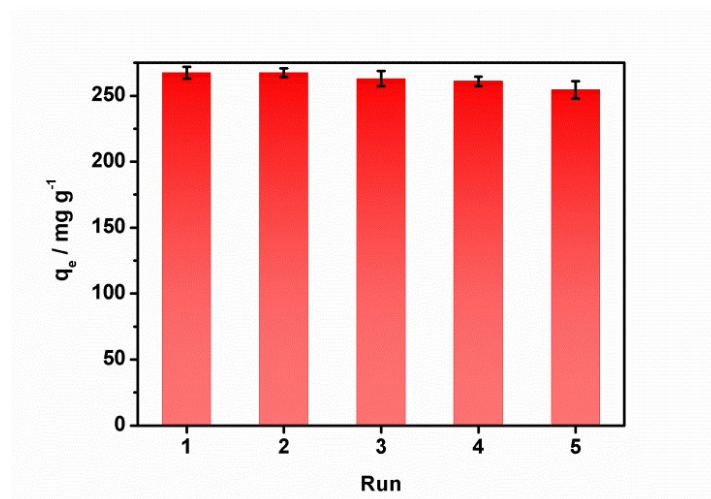

**Fig. S12** DMP adsorption capacity on the FS-MIL-53(Al) FM at different adsorption runs.

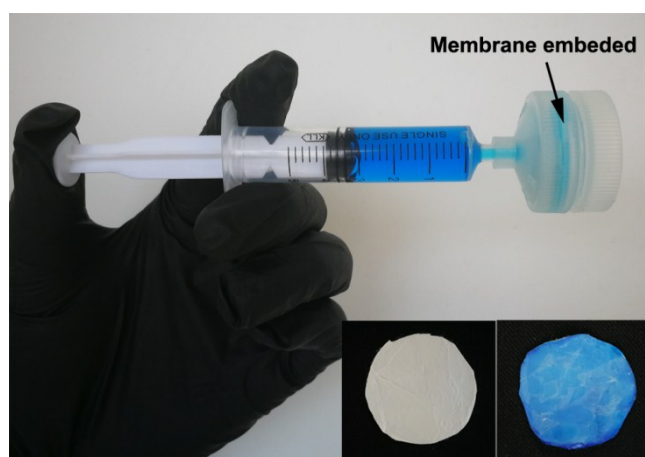

**Fig. S13** Photographs showing the FS-MIL-53(Al) FM applied as the filter in a filtration device for the separation of methylene blue from water. Inset shows the FS-MOF FM before and after filtration.



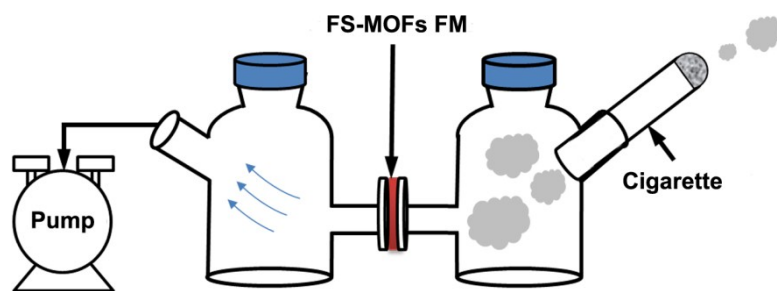

**Fig. S14** Illustration of the ‘smoking’ device with SF-MOFs FM as the filter.

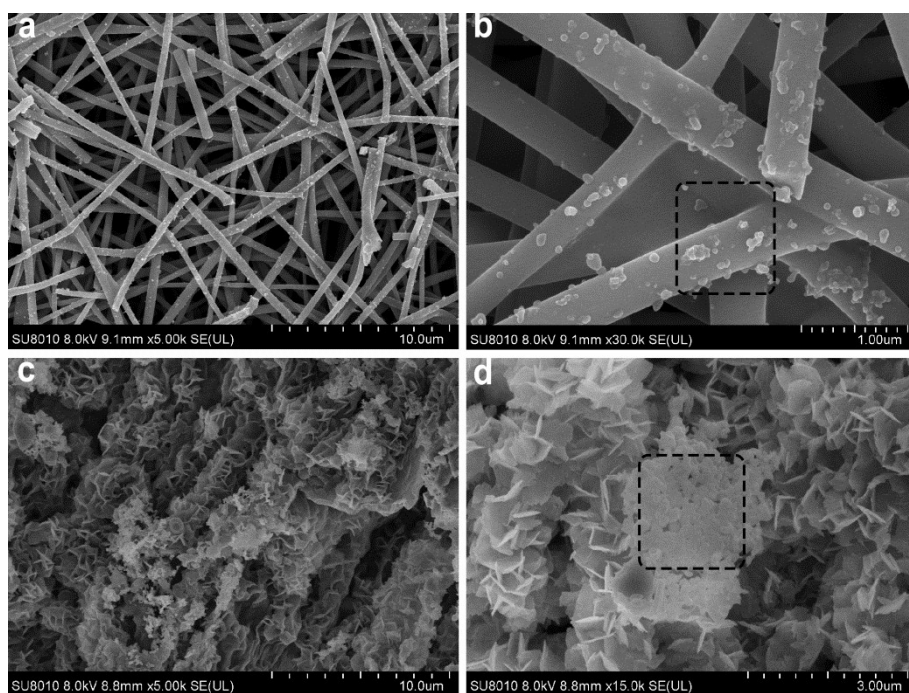

**Fig. S15** Low- and high-magnification SEM images of  $\text{Al}_2\text{O}_3$  FM (a, b) and FS-MIL-53(Al) FM (c, d) after smoke filtration. Dashed squares indicate the PM particles.

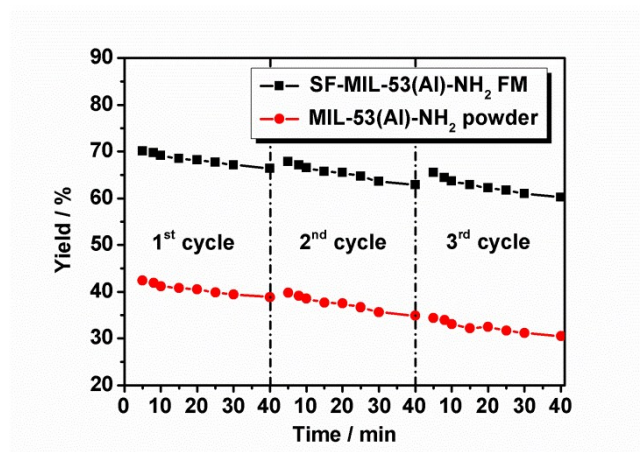

**Fig. S16** Time-dependent yield of Knoevenagel condensation at different cycles catalyzed by the SF-MIL-53(Al)-NH<sub>2</sub> FM and MIL-53(Al)-NH<sub>2</sub> powder in a plug-flow reactor at 50 °C.



**Table S1** Pore-texture properties of MIL-53(Al) and MIL-53(Al)-NH<sub>2</sub> samples.

|                                   | <b>BET SA (m<sup>2</sup> g<sup>-1</sup>)</b> | <b>V<sub>micro</sub> (cm<sup>3</sup> g<sup>-1</sup>)</b> | <b>V<sub>total</sub> (cm<sup>3</sup> g<sup>-1</sup>)</b> | <b>Ref.</b> |
|-----------------------------------|----------------------------------------------|----------------------------------------------------------|----------------------------------------------------------|-------------|
| FS-MIL-53(Al) FM                  | 1500                                         | 0.57                                                     | 1.1                                                      | This work   |
| MIL-53(Al) powder                 | 1035                                         | 0.49                                                     | 0.50                                                     | This work   |
|                                   | 1140, <sup>[4]</sup> 1064 <sup>[5]</sup>     | 0.51 <sup>[5]</sup>                                      | 0.54 <sup>[5]</sup>                                      | [4, 5]      |
| FS-MIL-53(Al)-NH <sub>2</sub> FM  | 1419                                         | 0.51                                                     | 1.1                                                      | This work   |
| MIL-53(Al)-NH <sub>2</sub> powder | 1082                                         | 0.52                                                     | 0.55                                                     | This work   |
|                                   | 950                                          | 0.23                                                     | 1.03                                                     | [6]         |

**Table S2** Conversion yield for various FS-MOFs FMs.

| <b>Metal oxide FMs</b>                  | CuO     | ZnO   | Co <sub>3</sub> O <sub>4</sub> | ZrO <sub>2</sub> | Fe <sub>2</sub> O <sub>3</sub> |
|-----------------------------------------|---------|-------|--------------------------------|------------------|--------------------------------|
| <b>FS-MOFs FMs</b>                      | HKUST-1 | ZIF-8 | ZIF -67                        | UiO-66           | MIL-88B (Fe)                   |
| <b>Conversion yield (%)<sup>a</sup></b> | 95      | 95    | 96                             | 95               | 95                             |

<sup>a</sup> The conversion yield was calculated by:  $Y (\%) = W_{\text{FM}}/W_{\text{P}}$  ( $W_{\text{FM}}$ : the total weight loss of FS-MOF FM,  $W_{\text{P}}$ : the weight loss of MOF powder). For example,  $Y_{\text{HKUST-1}} (\%) = 0.68/0.72 \times 100 \% = 95\%$ .

**Table S3** Pore-texture properties of HKUST-1, ZIF-8, ZIF-67, UiO-66 and MIL-88B(Fe) samples.

|                | <b>BET SA (m<sup>2</sup> g<sup>-1</sup>)</b> | <b>V<sub>micro</sub> (cm<sup>3</sup> g<sup>-1</sup>)</b> | <b>V<sub>total</sub> (cm<sup>3</sup> g<sup>-1</sup>)</b> | <b>Ref.</b> |
|----------------|----------------------------------------------|----------------------------------------------------------|----------------------------------------------------------|-------------|
| FS-HKUST-1 FM  | 1300                                         | 0.47                                                     | 0.66                                                     | This work   |
| HKUST-1 powder | 1109                                         | 0.40                                                     | 0.41                                                     | This work   |
|                | 692, <sup>[7]</sup> 1143 <sup>[8]</sup>      | —                                                        | 0.33, <sup>[7]</sup> 0.65 <sup>[8]</sup>                 | [7, 8]      |
| FS-ZIF-8 FM    | 1574                                         | 0.62                                                     | 0.82                                                     | This work   |
| ZIF-8 powder   | 1398                                         | 0.57                                                     | 0.62                                                     | This work   |
|                | 1072, <sup>[9]</sup> 1370 <sup>[10]</sup>    | 0.53, <sup>[9]</sup> 0.51 <sup>[10]</sup>                | —                                                        | [9, 10]     |
| FS-ZIF-67 FM   | 1701                                         | 0.66                                                     | 0.91                                                     | This work   |
| ZIF-67 powder  | 1486                                         | 0.58                                                     | 0.61                                                     | This work   |

|                       |        |      |      |           |
|-----------------------|--------|------|------|-----------|
|                       | 1319   | 0.61 | —    | [11]      |
| FS-UiO-66 FM          | 1512   | 0.52 | 0.77 | This work |
| UiO-66 powder         | 1134   | 0.48 | 0.49 | This work |
|                       | 1380   | 0.53 | 0.58 | [12]      |
| FS-MIL-88B(Fe)<br>FM  | 729    | 0.29 | 0.51 | This work |
| MIL-88B(Fe)<br>powder | 249.8  | 0.21 | 0.24 | This work |
|                       | 209.83 | —    | 0.42 | [13]      |

**Table S4** Adsorption isotherm model parameters for DMP adsorption on the Al<sub>2</sub>O<sub>3</sub> FM, MIL-53(Al) powder, and FS-MIL-53(Al) FM.

|                                                      | Langmiur model <sup>a</sup>          |                                      |                | Freundlich model <sup>a</sup> |                                        |                |
|------------------------------------------------------|--------------------------------------|--------------------------------------|----------------|-------------------------------|----------------------------------------|----------------|
|                                                      | q <sub>m</sub> (mg g <sup>-1</sup> ) | K <sub>L</sub> (L mg <sup>-1</sup> ) | R <sup>2</sup> | n                             | K <sub>F</sub> (mg(1-1/n)<br>L(1/n)/g) | R <sup>2</sup> |
| Al <sub>2</sub> O <sub>3</sub> FM                    | 31.6156                              | 1.7190                               | 0.9814         | 0.3905                        | 31.8434                                | 0.9568         |
| MIL-53(Al) powder                                    | 176.7085                             | 1.1341                               | 0.9923         | 0.2556                        | 84.1614                                | 0.8913         |
| 50%-MIL-53(Al)/<br>Al <sub>2</sub> O <sub>3</sub> FM | 126.5823                             | 1.0739                               | 0.9969         | 0.3088                        | 65.7597                                | 0.9502         |
| FS-MIL-53(Al) FM                                     | 267.5247                             | 1.3317                               | 0.9907         | 0.2335                        | 139.9132                               | 0.7789         |

<sup>a</sup> The Langmiur and Freundlich model were described by Equation 1 and 2 respectively, and used to fit the adsorption isotherms,

$$\frac{1}{q_e} = \frac{1}{K_L q_m C_e} + \frac{1}{q_m} \quad (1)$$

$$\lg q_e = \frac{1}{n} \lg C_e + \lg K_F \quad (2)$$

where  $q_e$  is the amount of adsorbate adsorbed per unit weight of the adsorbent at equilibrium ( $\text{mg g}^{-1}$ ),  $q_m$  is the maximum adsorption capacity ( $\text{mg g}^{-1}$ ),  $c_e$  is the equilibrium concentration of adsorbate in the solution ( $\text{mg L}^{-1}$ ),  $K_L$  is the Langmuir constant,  $K_F$  ( $\text{mg}^{(1-1/n)} \text{L}^{(1/n)}/\text{g}$ ) is the Freundlich constant that relates to the adsorption capacity, and  $n$  is the constant that signifies adsorption intensity.

**Table S5** Adsorption kinetics model parameters for DMP adsorption on the Al<sub>2</sub>O<sub>3</sub> FM, MIL-53(Al) powder, and FS-MIL-53(Al) FM.

|                                                   | Pseudo-first-order <sup>a</sup>     |                | Pseudo-second-order <sup>a</sup>     |                                                        |                |
|---------------------------------------------------|-------------------------------------|----------------|--------------------------------------|--------------------------------------------------------|----------------|
|                                                   | k <sub>1</sub> (min <sup>-1</sup> ) | R <sup>2</sup> | q <sub>e</sub> (mg g <sup>-1</sup> ) | k <sub>2</sub> (g mg <sup>-1</sup> min <sup>-1</sup> ) | R <sup>2</sup> |
| Al <sub>2</sub> O <sub>3</sub> FM                 | 0.0180                              | 0.9892         | 48.3092                              | 0.3172                                                 | 0.9980         |
| MIL-53(Al) powder                                 | 0.0255                              | 0.9705         | 188.9776                             | 0.5447                                                 | 0.9902         |
| 50%-MIL-53(Al)/ Al <sub>2</sub> O <sub>3</sub> FM | 0.0168                              | 0.9859         | 149.2537                             | 0.4753                                                 | 0.9980         |
| FS-MIL-53(Al) FM                                  | 0.0260                              | 0.9769         | 279.3296                             | 1.3480                                                 | 0.9959         |

<sup>a</sup> The pseudo-first-order and pseudo-second-order models were represented by Equation 3 and 4, respectively, and used to fit the adsorption kinetics:

$$\ln (q_e - q_t) = \ln q_e - k_1 t \quad (3)$$

$$\frac{t}{q_t} = \frac{1}{k_2 q_e^2} + \frac{t}{q_e} \quad (4)$$

where q<sub>e</sub> is the equilibrium adsorption capacity (mg g<sup>-1</sup>), q<sub>t</sub> is the adsorption capacity

at contact time  $t$  ( $\text{mg g}^{-1}$ ),  $k_1$  is the pseudo-first-order rate constant ( $\text{min}^{-1}$ ), and  $k_2$  is the pseudo-second-order rate constant ( $\text{g mg}^{-1} \text{min}^{-1}$ ).

## References

1. Y. Wang, W. Li, Y. Xia, X. Jiao, D. Chen, *J. Mater. Chem. A.*, 2014, **2**, 15124.
2. S. J. Choi, W. H. Ryu, S. J. Kim, H. J. Cho, I. D. Kim, *J. Mater. Chem. B.*, 2014, **2**, 7160.
3. S. Wei, S. Wang, Y. Zhang, M. Zhou, *Sens. Actuators. B: Chem.*, 2014, **192**, 480.
4. T. Loiseau, C. Serre, C. Huguenard, G. Fink, F. Taulelle, M. Henry, G. A. Férey, *Chem. Eur. J.*, 2004, **10**, 1373.
5. Z. Li, Y. N. Wu, J. Li, Zhang, Y. X. Zou, F. Li, *Chem. Eur. J.*, 2015, **21**, 6913.
6. X. Q. Cheng, A. F. Zhang, K. K. Hou, M. Liu, Y. X. Wang, C. S. Song, G. L. Zhang, *Dalton Trans.*, 2013, **42**, 13698.
7. S. S. Y. Chui, S. M. F. Lo, J. P. Charmant, A. G. Orpen, I. D. Williams, *Science*, 1999, **283**, 1148.
8. Z. Q. Li, L. G. Qiu, T. Xu, Y. Wu, W. Wang, Z. Y. Wu, X. Jiang, *Mater. Lett.*, 2009, **63**, 78.
9. S. R. Venna, M. A. Carreon, *J. Am. Chem. Soc.*, 2009, **132**, 76-78.
10. H. Y. Cho, J. Kim, S. N. Kim, W. S. Ahn, *Microporous Mesoporous Mater.*, 2013, **169**, 180.
11. Q. Shi, Z. Chen, Z. Song, J. Li, J. Dong, *Angew. Chem. Int. Ed.*, 2011, **50**, 672-675.



12. H. Wu, Y. S. Chua, V. Krungleviciute, M. Tyagi, P. Chen, T. Yildirim, W. Zhou,  
*J. Am. Chem. Soc.*, 2013, **135**, 10525.
13. X. Cai, J. Lin, M. Pang, *Cryst. Growth Des.*, 2016, **16**, 3565.
